# Supplementary material for: Chips/graphene conductive boards with excellent electromagnetic shielding properties
Source: Research Square preprint supplement (doi:10.21203/rs.3.rs-3857213/v1), 2024-01-15
Supplement: Supplementary file 1 [file 7f4eee08d0868666fdf6bafb.docx]

**Supporting Information**

**Chips/graphene conductive boards with excellent electromagnetic shielding properties**

Mingzheng Hao1, Lei Li2, Ding Feng2, Yibo Gao1, Hao An1, Zhaoxia Lv1* and Wencai Wang2*

1 The Department of Materials Engineering, Taiyuan Institute of Technology, Taiyuan 030008, China

2 College of Materials Science and Engineering, Beijing University of Chemical Technology, Beijing 100029, China

* Corresponding author: Zhaoxia Lv, E-mail address: 1294175190@qq.com, Tel.: 19834400095; Wencai Wang, E-mail address: wangw@mail.buct.edu.cn, Tel.: +86-10-64434860.

Table S1. The sample parameters and SE values of wood-based materials

| **Wood-based materials** | | **Thickness (mm)** | **SE (dB)** | | | **Ref.** | **Serial number** | |
| --- | --- | --- | --- | --- | --- | --- | --- | --- |
| Chips/graphene conductive boards | 2 | | | 49 | This work | | |  |
|
| Mxene/wood composite | 2 | | | 39.3 | [1] | | | S1 |
|
| EP/Carbon | 2 | | | 27.8 | [2] | | | S2 |
| C@WF/ZIF-8 | 0.14 | | | 46 | [3] | | | S3 |
| CMP/CS composite | 8 | | | 29.3 | [4] | | | S4 |
| Carbon foam | 10 | | | 44.7 | [5] | | | S5 |
| CF/PAM/wood/fiber | 0.38 | | | 32.7 | [6] | | | S6 |
| Conductive wood | 3.5 | | | 58 | [7] | | | S7 |
| Ni/porous Carbon (PC) | 2 | | | 50.8 | [8] | | | S8 |
| Anisotropic Carbon Scaffolds | 3.5 | | | 55 | [9] | | | S9 |
|
| WCM@N-G | 1.5 | | | 60 | [10] | | | S10 |
| Silver-plated porous wood | 2 | | | 50 | [11] | | | S11 |
|  |  | | |  |  | | |  |


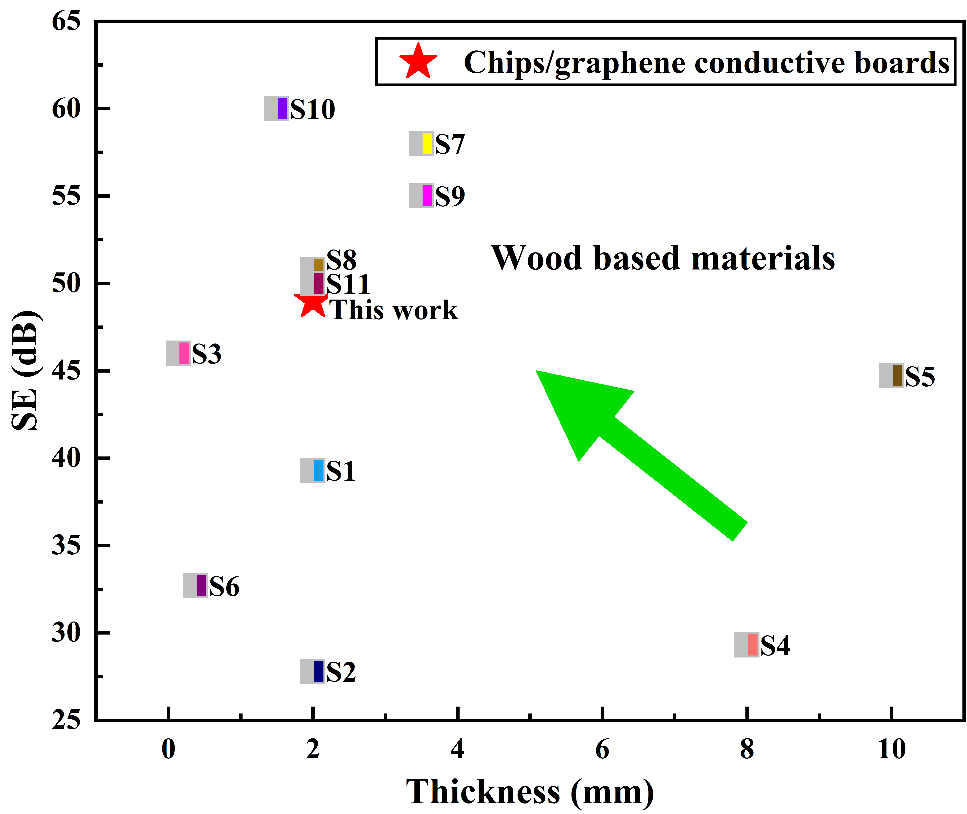


Figure S1. SE versus Chips/graphene conductve boards thickness compared to the reported wood-based EMI shielding materials

Table S2. Mechanical properties comparison of Chips/graphene conductive boards with previous reported wood-based materials.

| **EMI shielding materials** | | **Compressive**  **Strength (MPa)** | **Tensile**  **Strength (MPa)** | | | **Flexural Strength (MPa)** | **Ref.** | |
| --- | --- | --- | --- | --- | --- | --- | --- | --- |
| Chips/graphene conductive boards | 43.8 | | | 9.81 | 22.3 | | | This work |
|
| Carbon foams | 3.2 | | | — | — | | | [12] |
|
| Wood-derived carbon composite monoliths | 3.5 | | | — | — | | | [10] |
| Wood-derived anisotropic magnetic porous  carbon | 11.7 | | | — | — | | | [8] |
| Wood-plastic composites | — | | | 9.3 | 15 | | | [13] |
| Wood-derived composite (CMP/CS) | 1.53 | | | — | — | | | [4] |
| Silver-plated porous wood | — | | | 5.6 | — | | | [11] |

**References**

[1] Z. Wang, X. Han, X. Han, Z. Chen, S. Wang, J. Pu, MXene/wood-derived hierarchical cellulose scaffold composite with superior electromagnetic shielding. Carbohydrate Polymers, 2021, 254, 117033.

[2] Z. Shen, J. Feng, Preparation of Thermally Conductive Polymer Composites with Good Electromagnetic Interference Shielding Efficiency Based on Natural Wood-Derived Carbon Scaffolds. ACS Sustainable Chemistry & Engineering, 2019, 7(6), 6259-6266.

[3] X. Ma, J. Pan, H. Guo, J. Wang, C. Zhang, J. Han, Z. Lou, C. Ma, S. Jiang, K. Zhang, Ultrathin Wood-Derived Conductive Carbon Composite Film for Electromagnetic Shielding and Electric Heating Management. Advanced Functional Materials, 2023, 33(16), 2213431.

[4] Z. -X. Wang, X. -S. Han, Z. -J. Zhou, W. -Y. Meng, X. -W. Han, S. -J. Wang, J. -W. Pu, Lightweight and elastic wood-derived composites for pressure sensing and electromagnetic interference shielding. Composites Science and Technology, 2021, 213, 108931.

[5] X. Jia, B. Shen, L. Zhang, W. Zheng, Construction of shape-memory carbon foam composites for adjustable EMI shielding under self-fixable mechanical deformation. Chemical Engineering Journal, 2021, 405, 126927.

[6] Y. Jiang, X. Ru, W. Che, Z. Jiang, H. Chen, J. Hou, Y. Yu, Flexible, mechanically robust and self-extinguishing MXene/wood composite for efficient electromagnetic interference shielding. Composites Part B: Engineering, 2022, 229, 109460.

[7] W. Gan, C. Chen, M. Giroux, G. Zhong, M. M. Goyal, Y. Wang, W. Ping, J. Song, S. Xu, S. He, M. Jiao, C. Wang, L. Hu, Conductive Wood for High-Performance Structural Electromagnetic Interference Shielding. Chem. Mater, 2020, 32(12), 5280-5289.

[8] Y. Zheng, Y. Song, T. Gao, S. Yan, H. Hu, F. Cao, Y. Duan, X. Zhang, Lightweight and Hydrophobic Three-Dimensional Wood-Derived Anisotropic Magnetic Porous Carbon for Highly Efficient Electromagnetic Interference Shielding. ACS Appl. Mater. Interfaces, 2020, 12(36), 40802-40814.

[9] B. Zhao, P. Bai, S. Wang, H. Ji, B. Fan, R. Zhang, R. Che, High-Performance Joule Heating and Electromagnetic Shielding Properties of Anisotropic Carbon Scaffolds. ACS Applied Materials & Interfaces, 2021, 13(24), 29101-29112.

[10] Y. Yuan, X. Sun, M. Yang, F. Xu, Z. Lin, X. Zhao, Y. Ding, J. Li, W. Yin, Q. Peng, X. He, Y. Li, Stiff, Thermally Stable and Highly Anisotropic Wood-Derived Carbon Composite Monoliths for Electromagnetic Interference Shielding. ACS Appl. Mater. Interfaces, 2017, 9(25), 21371-21381.

[11] L. Li, Z. -J Tian, W. -X Lu, M. Tian, M. -Z Hao, W. -C Wang, Preparation of highly conductive silver-plated porous wood. Journal of Wood Chemistry and Technology, 2023, 43(4), 195-205.

[12] A. Chithra, P. Wilson, S. Vijayan, R. Rajeev, K. Prabhakaran, Carbon foams with low thermal conductivity and high EMI shielding effectiveness from sawdust. Industrial Crops and Products, 2020, 145, 112076.

[13] H. Xu, Y. Li, X. Han, H. Cai, F. Gao, Carbon black enhanced wood-plastic composites for high-performance electromagnetic interference shielding. Materials Letters, 2021, 285, 129077.
